# Supplementary material
Source: PubMed Central journal article supplement (PMC3024654)
Supplement: 1013746108_pnas.201013746SI.pdf [file 1013746108_pnas.201013746SI.pdf]

# Supporting Information

Acquati et al. 10.1073/pnas.1013746108

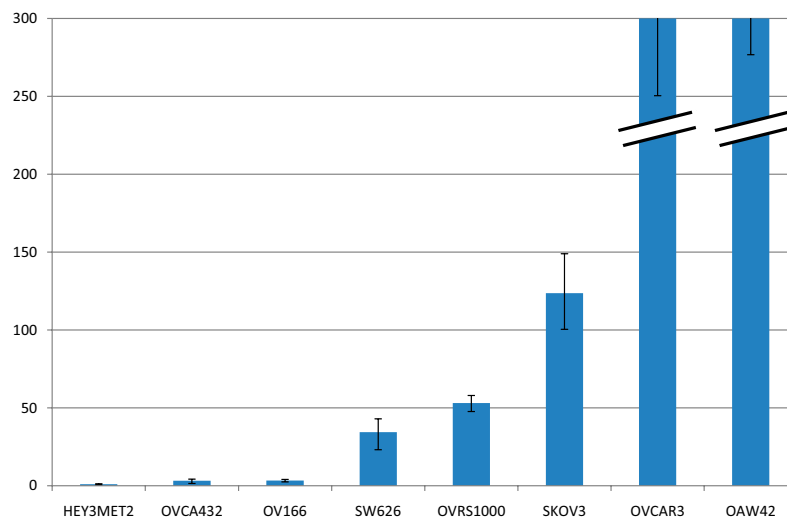

**Fig. S1.** Real-time RT-PCR analysis for relative quantification of the endogenous expression levels of RNASET2 in a panel of human ovarian cancer cell lines. The expression levels shown were normalized with those from the  $\beta$ -actin gene as an internal standard.

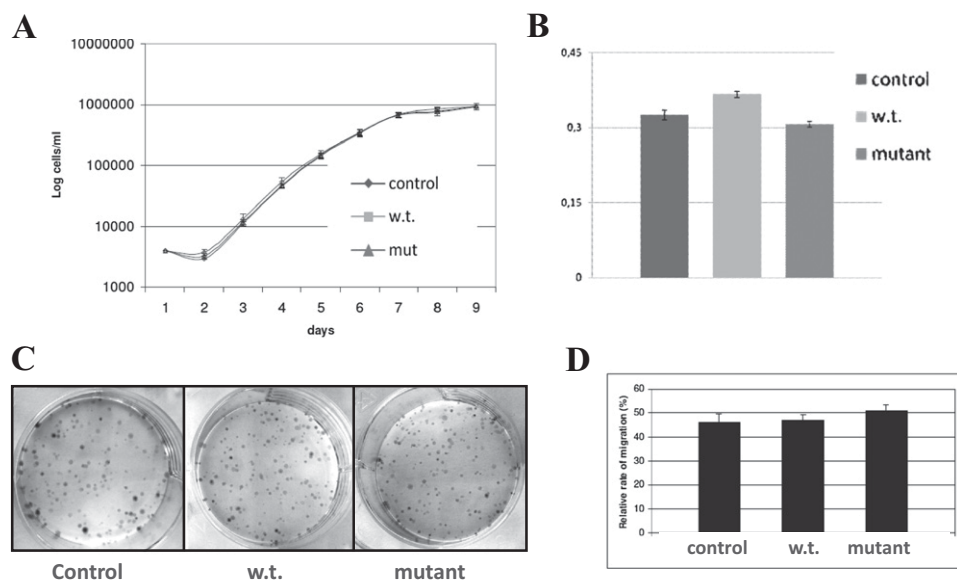

**Fig. S2.** RNASET2 overexpression in Hey3Met2 cells does not affect several in vitro cancer-related parameters. The panels show the results of proliferation (A), apoptotic rate (B), clonogenic (C), and migration (D) assays carried out on RNASET2-overexpressing clones and control, vector-only transfected clones. The experimental procedures for these assays are described in *Materials and Methods*.

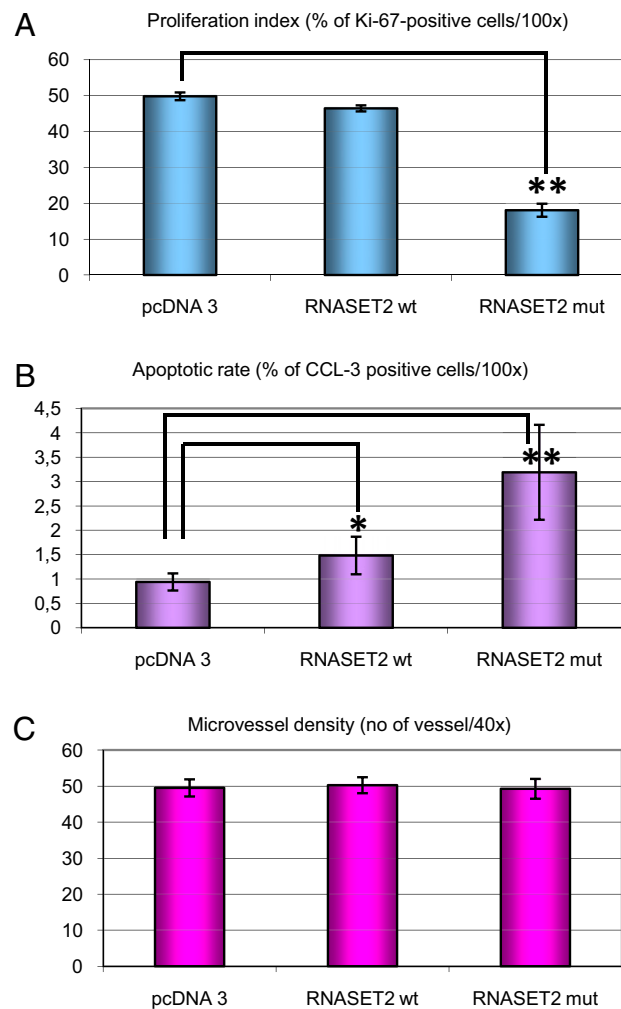

**Fig. S3.** Quantification of apoptotic, proliferating, and endothelial cells in RNASET2-expressing and control tumor samples following immunohistochemical (IHC) detection. Quantitative analysis of Ki-67 (A) and cleaved Caspase 3<sup>+</sup> (CCL-3<sup>+</sup>) cells (B) and CD31<sup>+</sup> blood vessels (C) is shown. For Ki-67 and CCL-3 IHC, results are expressed as percentage of Ki-67<sup>+</sup> cells  $\pm$  SE or percentage of CCL-3<sup>+</sup> apoptotic cells  $\pm$  SE per total number of cells, respectively. A total of 10 100x fields were examined and counted from three tumors of each of the treatment groups. The values were initially subjected to one-way ANOVA and then compared using unpaired Student's *t* test. For CD-31 IHC, vessel density was estimated by counting CD31<sup>+</sup> vessel structures with a 40x magnification using a squaric grid. Counting in at least six fields was done separately. The values were initially subjected to one-way ANOVA and then compared using unpaired Student's *t* test. \**P* < 0.05; \*\**P* < 0.01.

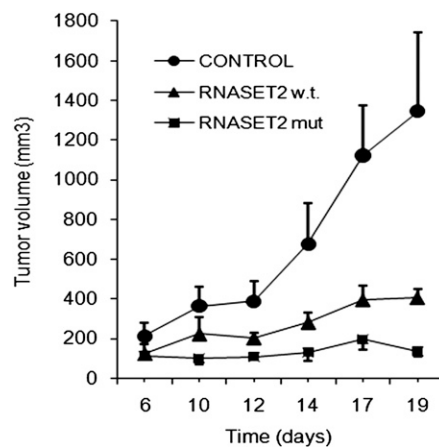

**Fig. S4.** Hey3Met2 clones stably transfected with control plasmid or RNASET2-expressing vectors were inoculated subcutaneously into Rag/γ-chain<sup>-/-</sup> double knock-out mice as described in *Materials and Methods*. Tumor growth was checked every 2 d until day 19. At least five mice were inoculated for each tested clone. Bars represent SD values.

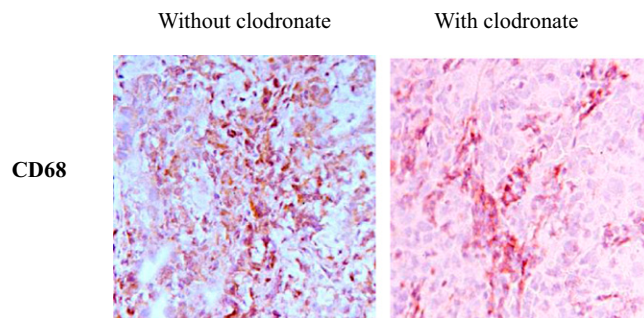

**Fig. S5.** Host macrophages are ineffectively depleted by clodronate following inoculation of mutant RNASET2-expressing Hey3Met2 cells. Rag2<sup>-/-</sup>γc<sup>-/-</sup> mice were pretreated with clodronate liposomes, as described in *Material and Methods* before injecting Hey3Met2 cells expressing catalytically dead mutant RNASET2. The effectiveness of clodronate treatment was evaluated by IHC analysis of tumor sections with the macrophage lineage-specific anti-CD68 antibody. (Magnification: 40x.)

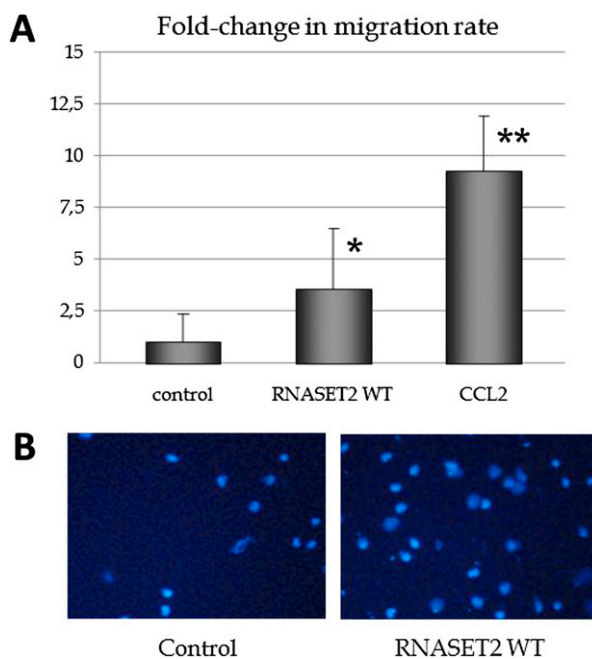

**Fig. S6.** Extracellular RNASET2 triggers monocyte chemotaxis in vitro. (A) Freshly prepared human monocytes were incubated in Boyden chambers with conditioned medium from control and wild-type RNASET2-expressing Hey3Met2 clones, as described in *Materials and Methods*. Recombinant CCL-2, a potent chemoattractor for human monocytes, was used as a positive control. The graph reports mean values for three independent Hey3Met2 clones. (B) A representative image of DAPI-stained nuclei from monocytes that have actively migrated through the filter.

**Table S1. In vitro analysis of control and RNASET2 stably transfected Hey3Met2 clones**

|                                     | pcDNA3 vector   | pcDNA3 RNASET2 wt | pcDNA3 RNASET2 mut |
|-------------------------------------|-----------------|-------------------|--------------------|
| Population doubling                 | 1,160 ± 12 min  | 1,172 ± 15 min    | 1,148 ± 16 min     |
| Clonogenic assay*                   | 230 ± 25 clones | 222 ± 19 clones   | 219 ± 20 clones    |
| Growth in soft agar*                | 22 ± 5 clones   | 26 ± 8 clones     | 28 ± 9 clones      |
| Cell motility <sup>†</sup>          | 100%            | 102%              | 105%               |
| Matrigel adhesion test <sup>‡</sup> | 0.32            | 0.36              | 0.29               |
| Apoptosis <sup>§</sup>              | 2.5%            | 3.1%              | 2.8%               |

Four independent clones for each transected construct were analyzed according to the methods described in *Materials and Methods*. Data were obtained from at least three independent experiments.

\*Values are expressed as average clone number/plate.

<sup>†</sup>Values are expressed as relative rate of migration with respect to the control clones.

<sup>‡</sup>Values expressed as average absorbance at 295 nm in three independent experiments.

<sup>§</sup>Values expressed as percentage of apoptotic cells detected with a TUNEL assay.
